# Supplementary material for: Bioinformatics and Raman spectroscopy-based identification of key pathways and genes enabling differentiation between acute myeloid leukemia and T cell acute lymphoblastic leukemia
Source: PubMed Central journal article supplement (PMC10229868; doi:10.3389/fimmu.2023.1194353), 2023-05-17
Supplement: DataSheet_1.pdf [file DataSheet_1.pdf]

## Supplementary Material

# Bioinformatics and Raman Spectroscopy-based Identification of Key Pathways and Genes Enabling Differentiation Between Acute Myeloid Leukemia and T Cell Acute Lymphoblastic Leukemia

Haoyue Liang<sup>1,2#</sup>, Xiaodong Kong<sup>3#</sup>, Zhijie Cao<sup>1,2#</sup>, Haoyu Wang<sup>1,2</sup>, Ertao Liu<sup>1,2</sup>, Fanfan Sun<sup>1,2</sup>, Jianwei Qi<sup>1,2\*</sup>, Qiang Zhang<sup>3\*</sup>, Yuan Zhou<sup>1,2\*</sup>

\* Correspondence:

Yuan Zhou  
yuanzhou@ihcams.ac.cn

Qiang Zhang  
zhangqiangyulv@163.com

Jianwei Qi  
qijianwei@ihcams.ac.cn

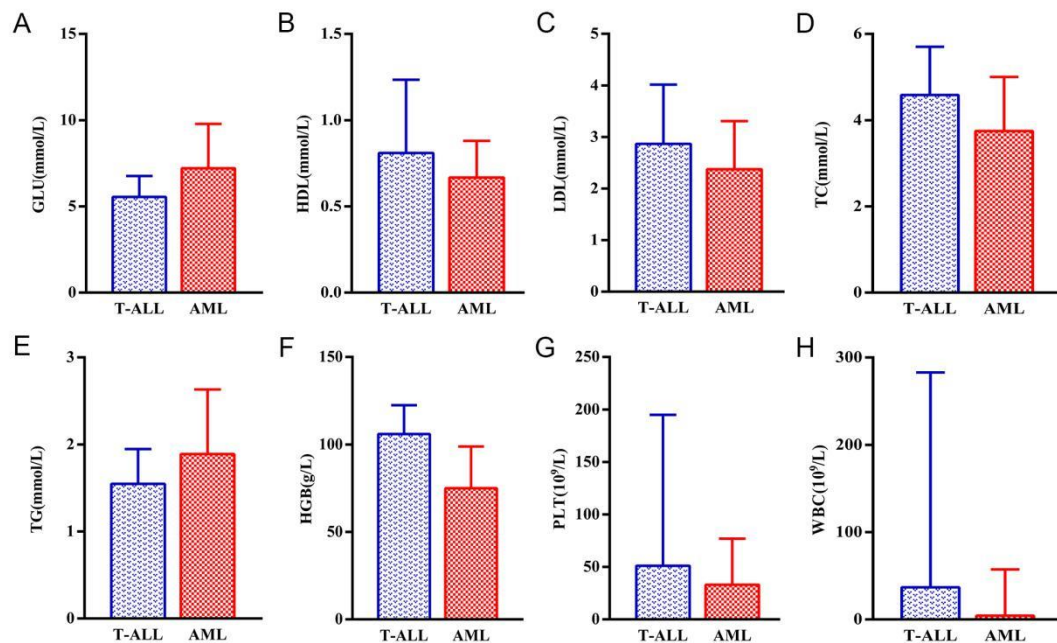

**Supplementary Figure 1** Serum biochemistry results in A. Glucose; B. High-density lipoprotein; C. Low-density lipoprotein; D. Total cholesterol; E. Triglycerides; F. Hemoglobin; G. Platelet; H. White blood cell

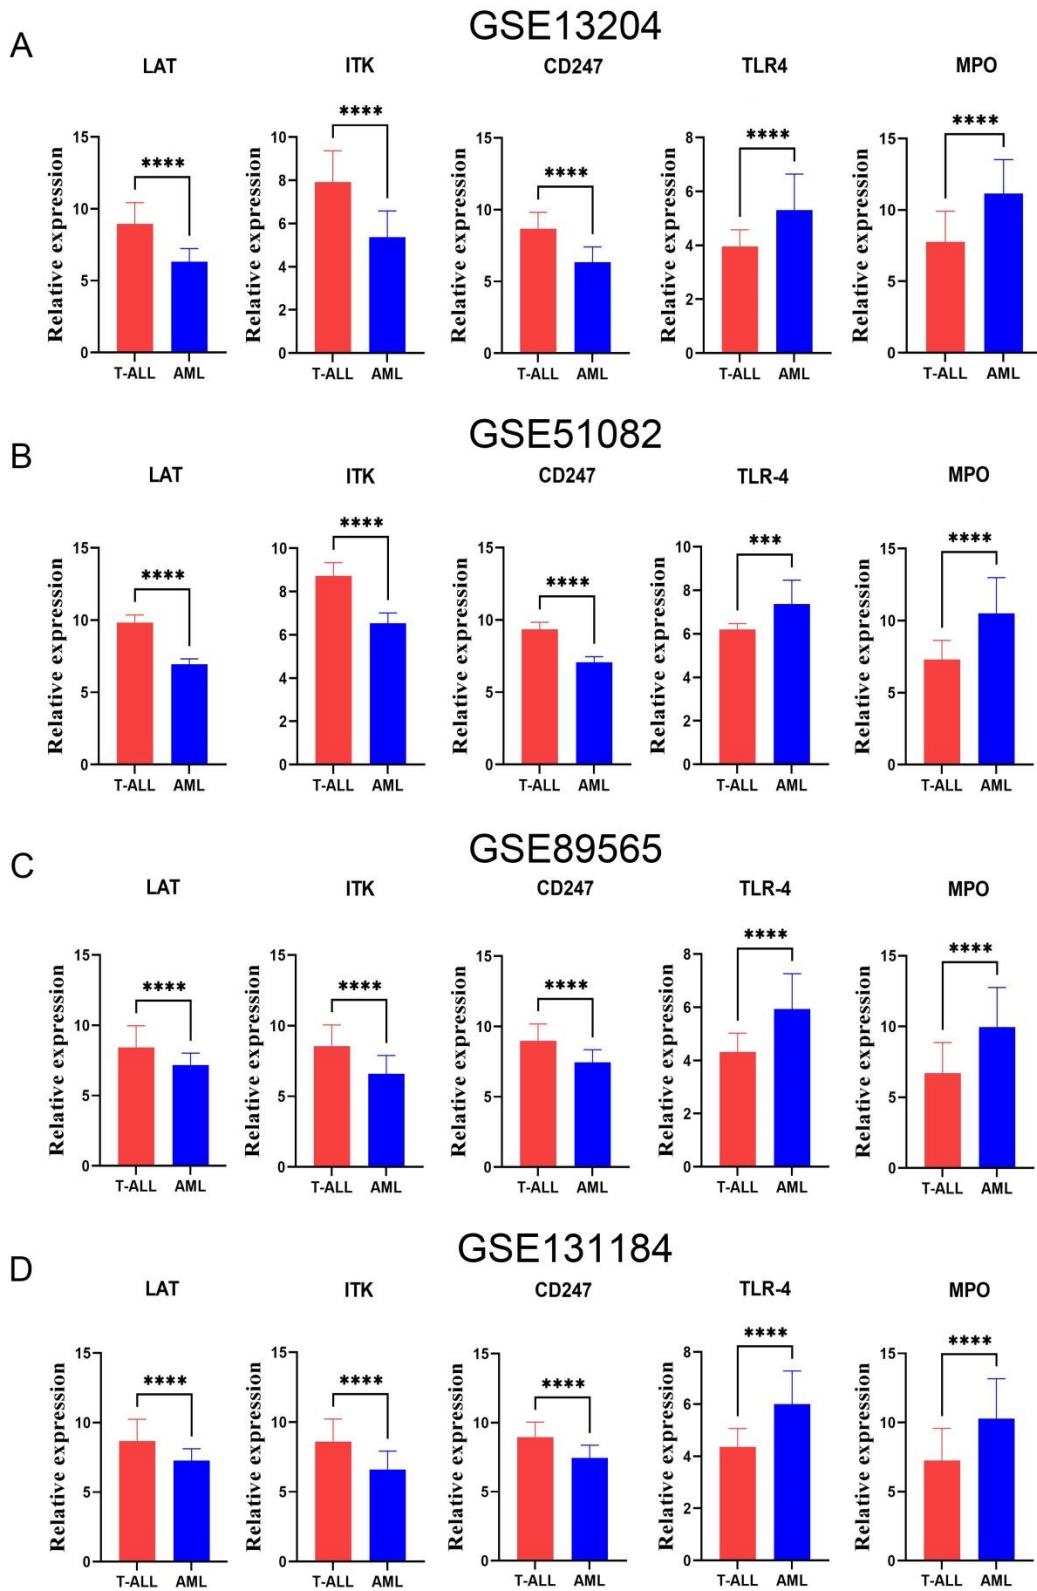

**Supplementary Figure 2** Relative expression of LAT, ITK, CD247, TLR-4 and MPO A. GSE13024; B. GSE51082; C. GSE89565; D. GSE131184. \*\*\*\* $P < 0.0001$ .

**Supplementary Table 1.** Peak assignments for Raman spectra of bone marrow supernatant

| Biochemical group        | Peak position (cm <sup>-1</sup> ) | Assignments                  | Reference    |
|--------------------------|-----------------------------------|------------------------------|--------------|
| Proteins and amino acids | 643                               | Tyr                          | (1, 3, 5)    |
|                          | 759                               | Trp                          | (1, 3, 5)    |
|                          | 1003                              | Phe                          | (1-3, 6)     |
|                          | 1260                              | Amide III                    | (1, 3, 4)    |
|                          | 1446                              | CH <sub>2</sub> bending mode | (1-3, 6)     |
|                          | 1548                              | Trp                          | (1)          |
|                          | 1603                              | Phe, Tyr                     | (1, 3, 4, 6) |
|                          | 1616                              | Tyr, Trp                     | (1, 3, 6)    |
|                          | 1654                              | Amide I                      | (1, 3, 6)    |
| Lipids                   | 1446                              | Lipids                       | (2, 3, 6)    |
| Nucleic acids            | 826                               | O–P–O stretch                | (1, 2)       |
|                          | 1573                              | Adenine, guanine             | (1)          |
|                          | 1579                              | Pyrimidine ring              | (1, 6)       |
| Collagen                 | 859                               | Collagen type I              | (1, 5)       |

Note: Abbreviations: Phe: phenylalanine; Tyr: tyrosine; Trp: tryptophan.

**Supplementary Table 2. Comparison of clinical data from subjects assigned to the T-ALL and AML groups**

|                          | T-ALL               | AML                 | Statistical value | P value |
|--------------------------|---------------------|---------------------|-------------------|---------|
| Gender Male(n)           | 1(3)                | 7(7)                | $\chi^2=5.833$    | 0.067   |
| Age (years)              | 18.00±5.51          | 34.71±9.15          | $t=-1.127$        | 0.292   |
| WBC(*10 <sup>9</sup> /L) | 36.73(5.27-282.98)  | 4.35(1.70-65.38)    | $Z=-1.254$        | 0.210   |
| PLT(*10 <sup>9</sup> /L) | 51.00(44.00-195.00) | 33.00(27.00-344.00) | $Z=-0.798$        | 0.425   |
| HGB(g/L)                 | 106.00±9.54         | 75.00±9.01          | $t=2.021$         | 0.780   |
| TP(g/L)                  | 64.13±0.30          | 68.16±1.83          | $t=-1.385$        | 0.203   |
| GLU(mmol/L)              | 5.56±0.70           | 7.22±0.97           | $t=-1.047$        | 0.326   |
| TG(mmol/L)               | 1.55±0.23           | 1.89±0.28           | $t=-0.739$        | 0.481   |
| TC(mmol/L)               | 4.58±0.65           | 3.75±0.48           | $t=0.989$         | 0.352   |
| HDL(mmol/L)              | 0.81±0.25           | 0.67±0.08           | $t=0.736$         | 0.483   |
| LDL(mmol/L)              | 2.87±0.66           | 2.38±0.35           | $t=0.717$         | 0.494   |
| ADA(U/L)                 | 171.53±139.54       | 26.39±3.27          | $t=1.040$         | 0.407   |

Note: Data not conforming to the normal distribution are expressed using M (range).

**Supplementary Table 3.** Common DEG identified in GSE13204, GSE51082, GSE89565 and GSE131184

---

Gene symbol (up-regulated DEGs)

---

LPAR6, SH3BP5, PRKCH, PPP1R16B, RCBTB2, CR2, USP9Y, ITM2A, KDM5D, ZEB1, ABLIM1, SERINC5, TXLNGY, SCN3A, FXYD2, TRIB2, NINL, NMT2, LDLRAD4, IL32, ENO2, PRKCQ, ARM CX2, CLGN, TSHR, AEBP1, GPRASP1, IL7R, CD247, ARPP21, ITK, LAT, MLLT11, PVRIG, ZNF711, FAT1, RASGRP1, CD1B, ELOVL4, TRAT1, DNNT, TSPAN7, MAL

---

**Supplementary Table 4.** Common DEG identified in GSE13204, GSE51082, GSE89565 and GSE131184

---

Gene symbol (down-regulated DEGs)

---

CFD, AZU1, MPO, TUBB6, CPA3, PDLIM1, CYTL1, KIT, FLT3, CCNA1, HLA-DRA, CSTA, ELANE, F13A1, HLA-DPA1, PRTN3, ECRP, RNASE3, PPBP, CSF2RB, MS4A3, MNDA, LYN, CEBPD, CTSA, PDGFC, CA2, NRGN, HHEX, IGFBP7, CTSG, STAR, LYZ, KLF4, ADRB2, LGALS1, LY86, GALNT11, THEMIS2, ARL4A, MLC1, HOMER3, ACSL1, FCER1G, CST7, MEST, PTGS2, ZNF185, PLTP, PLAGL1, TENT5A, PROM1, CLC, CYTIP, SERPING1, IRS2, CTSB, FNDC3B, RAB13, TIMP1, HEBP1, STX11, NCF2, GSAP, MAN1A1, NFE2, FOS, HLA-DMB, CYFIP1, MAP3K5, BLVRB, SAMHD1, MS4A6A, CD36, PRKAR2B, ASL, ERLIN1, BST1, GCA, FGL2, RAB31, DUSP6, GNS, HLA-DPB1, MEF2C, TSPO, RASSF2, C3AR1, GLIPR1, PRG2, VCAN, PNP, CST3, HLA-DQB1, TST, TFEC, FUT4, CTSS, RNASE6, EGFL7, PSTPIP2, PTGER2, CSF1R, B4GALT5, CD44, S100A4, LILRA2, DYNLT1, TNFRSF1B, TLR4, S100A11, IGF2BP2, STOM, SKAP2, CD14, CCR1, CPD, RGS2, S100P, CD74, SELENOP, TNS3, LGALS2, FCN1, MSRB1, FCER1A, LXN, TRIB1, C5AR1

---

**Supplementary Table 5. DEGs of AML vs T-ALL identified in GSE13204**

Gene symbol (up-regulated DEGs)

MAL,LCK,CD3D,CHI3L2,CD3G,TSPAN7,CTHRC1,DNTT,TRAT1,TRBC1,ELOVL4,HHIP-  
 AS1,CD1B,ZAP70,RASGRP1,GXYLT2,GATA3,SHISA2,BCL11B,FAT1,SH2D1A,CAMK4,PRTF  
 DC1,LEF1,CD3E,ZNF711,MZB1,TCF7,SNTG2-  
 AS1,CD2,UBASH3A,PVRIG,FAM110C,MLLT11,LAT,SEPTIN1,CD1E,CD7,ITK,TOX2,ZNF423,  
 PCAT18,FZD6,TOX,RHOH,ARPP21,HHIP,CD247,CD1A,RTL6,PKIA,EVL,IL7R,LINC01215,AR  
 L4C,CCR9,GPRASP1,AEBP1,FAM169A,SBK1,SCAI,KCNA3,IRX5,WAKMAR2,TSHR,CLGN,C  
 RNDE,ARMCX2,CYFIP2,PRKCQ,PABPC4L,ETS1,ENO2,ADA,ZNF827,PARD3,RUFY3,CD8A,  
 KIF3A,MYH10,NDST3,IL32,LINC01260,SLC7A3,PBK,PLCB4,LEF1-  
 AS1,HES4,EPHB6,LOC100505501,SALL2,GIMAP6,LDLRAD4,PIK3C2B,NMT2,NINL,TRIB2,F  
 XYD2,C12orf75,CDCA7,SCN3A,OCIAD2,FRMD6,MYEF2,MME,GIMAP7,RUBCNL,SLC23A1,  
 MIR646HG,DBN1,SCGB3A1,P2RX5,LIG4,TMEM263,SELENOW,TXLNGY,ZNF57,H2BW4P,G  
 ALNT6,NLRC3,PXYLP1,OGN,TASP1,SLC37A3,TBC1D4,SCN2A,UHRF1,ZEB1-  
 AS1,LBH,CRY1,TMEM131L,DBH-  
 AS1,IKZF2,SERINC5,ID3,VPREB1,DENND2D,RAB15,SPRY1,SLC5A3,TRAC,IGF2R,THEMIS,  
 LRP12,SLAIN1,IFITM1,LOC285097,STARD4,ABLIM1,SIT1,TFDP2,LUNAR1,ICOS,POU2AF1,  
 TCFL5,ZEB1,LIME1,NID2,CHRNA3,PLCG1,PXDN,AJAP1,CEP85L,GAS2,CBX1,XG,SFXN1,B  
 CL7A,HDGFL3,LY6H,PHGDH,FAM221A,GALNT2,GSPT2,NLGN4X,PEX5L,KDM5D,NUDT11,  
 LAX1,RAB39B,MAGED1,CEP70,CACNB3,PRKCQ-  
 AS1,SEC31B,RPS4Y1,DGKA,ITM2A,C12orf57,CD5,USP9Y,S1PR1,MARCKSL1,KIF15,ARHGE  
 F3,YPEL1,KBTBD6,N4BP2,PGGHG,LAMP3,ZNF329,CD96,OR7E14P,CR2,LINC01806,SEPTIN  
 6,PCBP3,NSG1,RCBTB2,ZBTB8A,UMODL1,EFCAB7,PTPRD,ZNF232,TET1,PRXL2A,LOC101  
 928963,ASPM,RRAS2,SSBP2,TENM1,TESPA1,ANKRD36B,LUC7L3,ZNF260,C8orf88,LIMS2,L  
 OC101928000,BUB1B,FGFR1,TCTEX1D2,PCNX2,PPP1R16B,CD28,MND1,E2F7,TBC1D31,ZNF  
 101,LINC01120,SOX4,FAM111B,DPY19L2P2,SNHG19,C11orf80,PAXIP1-  
 AS1,RAG2,CD27,PRKCH,ZNF738,MSANTD2,TMEM267,CCDC138,STMN1,PGM2L1,DDX5,H  
 ES1,RUNX1-  
 IT1,TCF12,GPR174,FCGBP,MAGEH1,HMHB1,CEP128,PITPNM2,HELLS,RAP1GAP2,LCT-  
 AS1,ADAM1A,BEX3,ARHGAP32,ZNF493,EPM2AIP1,CDH2,SH3BP5,VANGL2,PALLD,CBFA2  
 T3,BARD1,CDK5RAP3,B4GALT6,ZNF439,SYNE2,LPAR6,SLC16A10,HMGCS1,NEIL3,KANK4  
 ,UGP2,IRF1-  
 AS1,BAG3,H3C2,PGAP1,PLCL1,SMPD3,LZTFL1,PCDH9,TIAM1,MTA3,RIMS3,PAFAH1B3,AR  
 MCX1,CAPSL,NREP,VANGL1,SIX6,ZNF415,SGPP1,MELK,MYL6B,TTK,SHQ1,ARHGAP21,S  
 TK39,DPEP1,FAM24B,KANSL1,ZNF767P,TMEM237,PCSK5,SLIT1,RFX7,MAGEE1,ADAMTS1  
 7,MIR181A2HG,RNF150,MGAT4A,KCTD1,KLF12,CD47,ADGRG1,MCUB,TBC1D19,KATNAL  
 1,IRF2BPL,CDC25B,SLFN5,TRG-  
 AS1,CNOT6,MFHAS1,SHPRH,ABCD3,ADGRB2,MYO7B,CLDN5,NUF2,ZBED6CL,STAMBPL1  
 ,ELOVL5

**Supplementary Table 6. DEGs of AML vs T-ALL identified in GSE13204**

Gene symbol (down-regulated DEGs)

ANXA5,PPT1,ENTPD1,SNCA,SERPINB8,LHFPL2,LINC01410,CPEB4,SCPEP1,ITGA5,SLC35D2,CETP,MXD1,TPST2,PLXNB2,ADGRA2,PDIA3,CPQ,LOXL3,RBKS,APOBR,ATP10D,GABARAPL1,ICAM1,PDIA6,SETD9,HOXB2,SH2B3,ACSM3,ADGRE5,NKG7,NCEH1,FNDC10,STING1,OAT,DOK3,DENND3,C5AR1,AHR,TRIB1,MARCHF2,IRF7,STEAP3,RXRA,THEM4,CD163,PLD1,HACD4,BIK,TMOD1,IFI27,CD34,TMEM216,NAMPT,CNN2,LY75,C1QB,CITED4,VMP1,LXN,ZFP36,PILRA,PLOD1,PIK3CB,HDHD5,TM6SF1,FAM49A,TMEM9B,AGTRAP,LOC100507642,FCER1A,SWAP70,IGSF10,SLC7A7,PLPPR3,SMIM20,DHX32,CLEC12A,NABP1,LRG1,TNFRSF1A,EPX,COL23A1,EMILIN2,P4HB,CPPED1,ALDH3A2,CLIC2,RALB,GBP2,ZSCAN9,CBR1,ZBTB16,VKORC1,KCNQ5,MSRB1,HSPC324,PNPLA4,CNRIP1,ZNF296,IRF8,FHL3,PIM3,STRADB,NFKB1,CEBPB,ATP6V0D1,PTAFR,CARD6,RELB,CRIP1,GATA2,GPT2,DENND1A,NACC2,NDRG1,FCN1,CAVIN2,LGALS2,JDP2,RAB7B,TYMP,VRK2,GPR160,NUDT19,DTD1,TMX4,HDC,CD180,PPIF,SELENOK,PCTP,LGALS12,TENT5C,GALNT1,P2RY13,ICAM4,EPHX1,NAPSB,B3GALNT1,RNF135,METTL7B,AREG,CCND2,SLC2A5,TNS3,EVA1B,ECPAS,COTL1,CCDC189,SIRPA,TET2,APOBEC3B,SELENON,NEU1,NIBAN1,H2BC21,DIAPH2,AOAH,SLC2A3,SGK1,PLAC8,GGTA1P,SNX9,VSIG4,KLHL2,SELENOP,PLEKHO2,HAL,ADAM28,CYSLTR1,NRIP3,LINC01943,PREX1,ALCAM,DHRS9,SERPINB1,C11orf74,MAP3K1,KCNE3,ARPC1B,KLF1,C9orf43,SUMF1,WFDC1,RHBDF2,PROSER2,CTSD,CD151,ADAP1,DYSF,TP53INP2,SPTLC2,IFNGR1,CAT,TBK1,CXCL3,JUP,TSPAN32,ANXA1,SDSL,SELENBP1,MANBA,PLP2,LMNA,MCRI2,CD74,ELF4,MN1,CITED2,SLC43A1,PLOD3,MGAT4B,RRN3P2,CTSL,ATP2B1,DPEP2,HOXA10,CXCL12,BCL2A1,HSH2D,CPNE2,ROGDI,KCNE5,HCST,PCBD1,LYL1,S100P,ITGAV,SERPINB10,EREG,TSPAN4,KLF3,CD86,RGS2,PXK,ZSWIM6,IL3RA,1-Mar,ACTN4,MGST2,ZNF804A,PFKFB3,GBGT1,GRB10,DEFB1,FBP1,MAP3K8,GOLIM4,IL1RAP,FAM107B,JCHAIN,PHACTR1,ZEB2,GGH,KLF10,TNFSF13,SPNS2,PLD3,NOD2,ELL2,STAP1,ATP6AP1,SLITRK4,CCL5,GPD1L,CYBRD1,JUNB,M6PR,EGLN1,PLXDC2,ZNF516,VAMP8,CACNA2D3,LAMP2,MAN2B1,CPD,SNTB1,SYNGR1,FCHO2,BSG,S100A10,PYCARD,CCR1,CD14,RAB27A,MAFF,FAM210B,NFKBIE,SKAP2,SPINK2,LPCAT2,STOM,IGF2BP2,FBXO6,UPP1,S100A11,GPR27,FOSL1,FOXC1,VSIR,TLR4,TNFRSF1B,SCO2,P2RY2,DYNLT1,ARSD,ASAHI,IL10RA,HGF,TRH,CD55,LILRA2,S100A4,GMPR,NLRP3,SMIM3,TRIM58,MFSD10,CD44,UBE2E3,B3GNT5,TPP1,WDFY1,SLCO3A1,HSD17B11,SLC39A11,OGFRL1,DUSP5,ADM,LINC00623,NAGA,B4GALT5,C3orf80,SIRPB2,DEPDC7,GLA,PLBD2,CIDEB,PARVB,CSF1R,PTGER2,MRCKI,PSTPIP2,SPARC,BHLHE40,STAB1,GPAT3,DUSP23,CDKN1A,SLC27A3,ADGRE1,GNAI1,LDLRAD3,SPI1,EGFL7,RNASE6,CTSS,ZG16B,FUT4,IL6R,ABHD17C,CHCHD10,LTC4S,TFEC,PRSS21,TST,HMOX1,MAP7,HLA-DQB1,DUSP3,ANXA4,CST3,PNP,HEXB,EPS8,CLU,VCAN,CTSW,PRG2,BABAM2-AS1,JAG1,GLIPR1,C3AR1,KLF11,NR1H3,CTNNA1,SLC35F2,RASSF2,TSPO,LOC643072,MEF2C,HLA-DPB1,PIK3AP1,SPATA20,GNS,HYAL3,OSCAR,RILPL2,PTGS1,DUSP6,RAB31,SLC25A43,FGL2,PDE4B,NPR3,ID2,GCA,IL1B,SLC27A2,BST1,ERLIN1,CD63,ASL,MS4A7,NPW,PRKAR2B,NPC2,NKX2-3,IMPA2,CD36,MS4A6A,SAMHD1,TLR1,BLVRB,XK,PTH2R,CXCL8,MAP3K5,CTBP2,EGR1,OIG1,MSRB3,PF4,ERMP1,CYFIP1,VSTM1,CCL23,GPX1,LMO2,HLA-DMB,FOSB,FOS,NFE2,NFIL3,SRGN,ATP2B1-

---

AS1,MAN1A1,CLEC5A,SPOPL,SUCNR1,LAPTM4B,GSAP,SLC22A15,TTC7B,MYO1F,NCF2,PIWIL4,STX11,TMEM220,MPEG1,PPP3CA,SDC4,PLAUR,HEBP1,MYADM,SRXN1,SLC31A2,LATS2,TIMP1,RAB13,FNDC3B,C17orf58,PRKCD,CTSB,IRS2,SERPING1,HCAR3,METRNL,CYTI P,IL13RA1,CLC,PROM1,KRT18,TENT5A,NR4A2,HLX,PRRG4,PLAGL1,RGS18,GTSF1,PLTP,IMPACT,ZNF185,TRBV27,PTGS2,FOSL2,TREM1,PLA2G4A,MEST,HOXA5,MFSD1,CST7,SLC22A4,FCER1G,ZYX,ACSL1,HOMER3,MEIS1,SERPINB2,MLC1,ARL4A,HCK,THEMIS2,FUCA2,GALNT11,PRAM1,RIPK2,CFP,LY86,IRAK3,APLP2,LGALS1,CD300LF,GRN,ADRB2,KLF4,MA MDC2,LYZ,BTK,LOC101928429,STAR,LOC105377276,CTSG,IGFBP7,HHEX,GAPT,NRGN,CA 2,PDGFC,C1QTNF4,PLEK,PYGL,GPR183,CTSA,CEBPD,CREG1,LYN,CSF3R,NCF4,PROK2,M NDA,TLR2,TPSAB1,MS4A3,C1orf162,CSF2RB,PPBP,DRAM1,TYROBP,RNASE3,ECRP,LRMD A,FES,PRTN3,HLA-DPA1,F13A1,FCGR1B,ELANE,PTX3,CD33,CSTA,HLA-DRA,CCNA1,IL18,FLT3,PRXL2C,KIT,CYTL1,HLA-DMA,MGST1,PDLIM1,CEBPA,RNASE2,CPA3,TNFSF13B,TPSB2,TUBB6,MPO,ATP8B4,AZU1,CFD

---



## Supplementary Table 7. DEGs of AML vs T-ALL identified in GSE51082

Gene symbol (up-regulated DEGs)

LCK,CD3D,TRBC1,MAL,RASGRP1,BCL11B,TSPAN7,PGGHG,CHI3L2,DNTT,SCN3A,ITM2A,CD7,LAT,MZB1,IL32,MLLT11,CD2,LTB,TRAC,TRAT1,FAT1,CD3E,LBH,ZAP70,RCBTB2,EN O2,TCF7,EVL,PVRIG,RHOH,CD247,LEF1,KRT1,USP20,TRIB2,GPRASP1,GATA3,ITK,CD1E,TUBB2A,SH2D1A,SYNE2,ARL4C,ADA,ELOVL4,GALNT6,STAM,DENND2D,MARCKSL1,SPRY1,FZD6,CD1B,UBASH3A,TXLNGY,CYFIP2,DGKA,FXDY2,EPHB6,PRKCQ,HELLS,MFHAS1,SOX4,CRY1,SELENOW,TCFL5,AEBP1,LPAR6,ST18,TOX,ZNF107,ADGRG1,TENM1,DBN1,TRAF5,ZNF711,CD28,ZNF91,INSIG1,LINC00342,LZTFL1,NINL,ELOVL5,CHD1,PIK3C2B,JAM3,CCR9,HMGCS1,USP9Y,SIX6,TBC1D4,TTK,TBC1D31,SEPTIN6,NDST3,ZNF423,ATP2A3,STMN1,CD1A,CD3G,TCEAL9,DHCR24,SERINC5,CBFA2T3,PTBP2,PKIA,CD8A,PTPRK,HMGCR,ENOSF1,NPTX2,ARPP21,TCF12,BEX3,ASPM,TTF1,MSMO1,KDM5D,CDK5RAP3,DDIT4,PPP1R16B,LINC01260,SLC4A8,MMD,MREG,CXADR,ZEB1,CLUHP3,BARD1,SH3BP5,SLC5A3,NOTCH1,HPGD,SCAI,CAPRIN2,EZH2,ACVR2B,ABLIM1,CR2,TMEM131L,ARID5B,DPY19L2P2,GNA15,HNRNPA1,ZNF331,ECT2,FUT8,CBX1,ZNF529,POU2AF1,CEP55,ABCD3,P2RX5,NLGN4X,CDC25B,GRAMD4,ITGAE,IL7R,ZSCAN18,LDLRAD4,SIT1,SEC31B,CD96,PRKCH,SSBP2,HDAC4,RUNX1-IT1,TASP1,SRSF11,CD2AP,CD6,DMTF1,SLC38A1,CCND3,TRAPPC10,EPM2AIP1,BDH2,DSTN,VAT1,NUP58,KRT2,C11orf80,SCD,CLK1,NAXD,HIVEP2,ALDH1A2,PCBP3,NOL11,NMT2,S LAMF1,BUB1B,PTPRCAP,PPM1A,ATXN7,MRTFB,NMRK1,SPTAN1,FBXO21,SH3GLB2,TSPYL4,CNOT6,MCUB,TCERG1,DDX39A,TSHR,FMR1,ACAD8,MSL2,ZBTB20,DSG2,ANKRD10,ZMYM2,PIK3R3,MYH10,SEPHS1,CSRNP2,CCDC92,PHGDH,SPTBN1,KDM3A,BTN3A2,PNMA1,PTPN3,KIF15,ARMCX2,SH2D2A,NSD2,EZR,MYL6B,KLRB1,CD27,ARHGEF7,PBK,ZNF135,CLGN

**Supplementary Table 8. DEGs of AML vs T-ALL identified in GSE51082**

Gene symbol (down-regulated DEGs)

CDKN1A,TALDO1,FBP1,GAA,DUSP1,CD164,TMX4,ERP29,MXI1,LRPAP1,HSD17B4,ADGRE  
 2,IL13RA1,KCNN4,FOSB,HLA-  
 DQB1,CES1,PRCP,SNAP29,HOXA10,DPEP2,PPA2,METTL7A,CST7,XPNPEP1,GSTO1,CD55,C  
 AP1,KLF1,C5AR1,TGIF1,RGS19,SYNGR2,LAPTM4A,BSG,TNFRSF1B,SIPA1,TDRD7,PPT1,LI  
 PA,CPA3,TOR4A,ASL,NKG7,SEC11A,MSRB1,ATP6V0D1,GLA,ID2,CCR1,TBXAS1,INPP5D,R  
 AB27A,ASAH1,PDIA6,DEFA4,ZFP36,IRF7,STOM,GALNT11,CLU,PGD,CSF1R,ARHGGEF40,FC  
 GR2A,KLF11,GYG1,RBM47,AOAH,PLP2,ELK3,EGFL7,MRPL33,XBP1,LMNA,CD163,CCND2,  
 ITGB2,LYST,TST,SERPING1,SLC31A2,IRF8,ECPAS,SPTLC2,AHNAK,TLR4,RAB9A,ADRB2,C  
 TSC,FAH,HK3,CYFIP1,MEST,CTBP2,LAMP2,HLA-  
 DMB,CTSW,SIRPA,S100A8,RPS27L,CTSD,GSTK1,CPD,LYL1,EVA1B,CTNNA1,LTBR,PNP,TI  
 PARP,MGST2,PRSS21,CDA,PLCG2,ZNF185,DUSP3,MAP3K5,IDH1,SYK,CASP1,SNX3,CCNA1  
 ,ARL4A,MCTP1,DENND5A,CLEC11A,SLC27A3,CXCL8,ALCAM,NR4A2,SNX2,PLXND1,F13  
 A1,WDR41,S100P,SKAP2,PSTPIP2,ADGRE5,C3AR1,MCL1,MGST3,CD44,STAR,EVI2B,CD93,  
 PTGS2,GOLGA8N,LXN,C1QA,M6PR,TNFRSF1A,ACTN1,PLD3,PRG2,FCER1A,RAB31,TPP1,F  
 TL,CTSS,PDIA3,BST2,MS4A4A,S100A12,CYTIP,GNS,LGALS2,B4GALT5,PRKAR2B,LITAF,F  
 UT4,SELENOP,VNN1,TBK1,HLX,MAN2B1,ECRP,MFSD10,TUBB6,LEPROT,RAB13,MEF2C,T  
 NS3,LY86,RASSF2,PTGER2,PLTP,MYO1F,GALNT1,RNASET2,MAN1A1,PPBP,PLAGL1,PRO  
 M1,STX11,CAT,CD9,RGS2,CSF2RB,GSAP,SAMHD1,CD36,BST1,CLC,CD33,ARL6IP5,S100A6,  
 DYNLT1,CYTL1,KLF10,LILRA2,CTSB,ZEB2,BTK,IFNGR1,GSN,CYBA,MS4A6A,MLC1,BLVR  
 B,KCTD12,PRKCD,NRGN,FCN1,C11orf21,ERLIN1,TLR2,CEBPB,NFE2,HHEX,HOMER3,KLF4  
 ,COQ2,PDLIM1,TPSAB1,NFIL3,TSPO,IMPA2,ANXA1,IGF2BP2,RNASE3,FCGR1B,FCER1G,C  
 D14,ANXA4,TIMP1,S100A11,PPP3CA,NCF2,ZYX,HLA-  
 DPA1,DRAM1,FLT3,CD63,BASP1,ACSL1,LYZ,PRTN3,PLEK,IRS2,S100A9,FOS,DUSP6,SERPI  
 NB1,VCAN,HEXB,LGALS3,PYCARD,LYN,GCA,STAB1,FGL2,THEMIS2,NPC2,EAF2,PDGFC,  
 FES,IRAK3,SCPEP1,CFP,VAMP8,HEBP1,CTSA,CITED2,PYGL,APLP2,RNASE6,TNFSF13,CEB  
 PD,MFSD1,SRGN,IGFBP7,CA2,HLA-  
 DPB1,HSD17B11,TPSB2,S100A4,GRN,HCK,GLIPR1,LMO2,KIT,GPX1,TFEC,LGALS1,SPI1,MS  
 4A3,HLA-DRA,CREG1,CEBPA,CTSG,CD74,SERPINB6,TRIB1,FNDC3B,PLAC8,HLA-  
 DMA,CSF3R,NCF4,TENT5A,MNDA,CST3,ELANE,CSTA,MPO,ATP8B4,TYROBP,RNASE2,CF  
 D,AZU1

---

**Supplementary Table 9. DEGs of AML vs T-ALL identified in GSE89565**

---

Gene symbol (up-regulated DEGs)

---

CTHRC1,CD3D,GXYLT2,SNTG2-  
AS1,FZD6,GAS2,CCR9,CHI3L2,LCK,ZNF711,CD7,ZAP70,GATA3,HHIP-  
AS1,TRBC1,TRAT1,PLCB4,TOX2,TSPAN7,MAL,BCL11B,MZB1,ELOVL4,PRTFDC1,FAM110  
C,SHISA2,FAM169A,HHIP,LOC285097,RASGRP1,DNTT,CD3G,SPRY1,CAMK4,LINC01215,S  
CN2A,ZNF827,CRNDE,ITK,NDST3,IFI44,FRMD6,CD3E,RHOH,ATP9A,SH2D1A,USP9Y,WAK  
MAR2,UBASH3A,MYEF2,ARPP21,TCF7,PCAT18,STARD4,TOX,PPP1R16B,CLGN,P2RX5,AR  
MCX2,LUNAR1,ICOS,RUFY3,FAT1,ARL4C,NID2,ZBTB8A,IFI44L,CRY1,MME,XG,H2BW4P,  
UMODL1,SLC19A2,LEF1,HES4,SCAI,IL7R,CD247,PGAP1,STAT4,C12orf75,TASP1,KDM5D,N  
4BP2,SBK1,VPREB1,KIF3A,TUBB2A,TRIB2,GJA1,SCN3A,ITM2A,CYFIP2,LEF1-  
AS1,SEPTIN1,NMT2,LAX1,TMEM131L,GPRASP1,TENM1,GALNT6,PGGHG,KRT72,CHD1,CL  
DN5,LOC101928963,CHRNA5,CAPSL,SEC31B,MLLT11,PIK3C2B,AMIGO2,CD1B,SCGB3A1,L  
ZTFL1,ZNF682,RPS4Y1,PXDN,DBH-  
AS1,LINC01238,PVRIG,CDH2,CEP85L,ENO2,IFITM1,DUXAP10,MIR646HG,SH3BP5,AEBP1,S  
FXN1,TTY15,FCGBP,TXLNGY,C11orf80,ALMS1-  
IT1,PTPRK,RUBCNL,EVL,MREG,PTPRD,SERINC5,KCNK17,LIPC,PJVK,RAP1GAP2,DDIT4,A  
LDH8A1,ZBTB21,CD96,GALNT2,CXorf65,LAT,GPR174,PRKCH,TKX,FXD2,ADAMTS1,SPA  
G1,TNFAIP3,BACE2,SLC7A3,HAUS3,ERV3-  
2,CR2,IL32,BTBD11,RANBP2,PCDHB14,LINC01806,TRO,CLK1,RFPL3S,DPEP1,PRKCQ,PABP  
C4L,PMAIP1,GBP1,LDLRAD4,NBAT1,SLC37A3,SLC4A4,NSG1,MORC4,RHOBTB1,NAP1L5,S  
MIM17,ZEB1,MAP4K3,ELOVL5,LINC01260,ENPEP,RNF103,PTBP2,CCDC138,EPSTI1,ARHG  
AP5,EIF1AY,HES1,NECTIN3,DGKA,PRSS2,RORA,RAB15,PCDH10,HMHB1,PXYLP1,TSHR,C  
CNL1,LRP12,ABLIM1,TFDP2,LPAR6,CENPU,CNN3,TMEM178A,NUCB2,ERVFRD-  
1,SLC4A8,RTL6,ZNF57,PIGA,EPHB6,VASH2,DPP4,HMGCS1,LGALS3BP,SLC7A11,CCDC136,  
BAG3,LCT-  
AS1,CCDC141,TIAM1,ARHGAP21,MGAT4A,LOC100505501,TSPYL2,NINL,S1PR1,THUMPD2  
,CEP95,PLCG1,CLCA1,CEP70,CDCA7,SLC30A4,FGFR1,LOC105375172,MOB1B,STAM,NLRC  
3,WRN,PLCG1-  
AS1,KLF12,VANGL2,DDX3Y,RGS9,LINC00597,RCBTB2,SH2D2A,GORAB,TESPA1,HNRNPA  
1,LRP2BP,YOD1,OCIAD2,PLEKHA7,TNF,TBC1D32

---

**Supplementary Table 10. DEGs of AML vs T-ALL identified in GSE89565**

Gene symbol (down-regulated DEGs)

C1QTNF4,LRRC25,UCP2,TRIM6,PSD3,CKM,RAB32,LTC4S,MGAT4B,BAX,C2orf76,CD93,OR  
 MDL2,AHSP,CPVL,PTGER2,RRAGD,SELENOP,PIWIL4,ASAP2,SERPINB2,PSENNEN,GYG1,A  
 NGPT1,DYNLL1,PIK3CG,HHEX,TLR1,HMOX1,SDC4,H2BC12,FGD4,LCN2,HOXB3,PEAR1,D  
 PY19L2,FKBP9,JAML,TMA16,PSTPIP2,CCL5,MILR1,MRPS21,TNFAIP6,CLCC1,P2RY2,CTSD,  
 PNPLA4,MRPS28,THEM4,SIPA1,PLD3,METTL7B,LINC01410,TNFRSF1B,CLIC2,PHF23,GLRX  
 2,TNFSF13,ACVR1,KYNU,HOXB-  
 AS3,CD37,CD24,MIR10A,CYTIP,ARHGEF40,HDHD5,TMEM71,TMEM106B,DEGS1,FAM210B  
 ,DHRS7B,TPK1,SH3BGRL3,LILRB2,RALB,DYNLT1,RBPMS,FCHO2,EGR2,CST7,GFI1B,ANX  
 A3,CX3CR1,TRIB1,SEPTIN11,NDUFV3,MUC19,LRRK2,EGFL7,RHBDF2,BASP1,TMTC2,BRI3  
 BP,SLC2A5,SHTN1,CERS6,LINC00899,LGALS2,CCDC126,HBB,RASSF2,C1GALT1C1,GNS,C  
 YBRD1,IGF2BP2,HPCAL1,MVP,NCEH1,RILPL2,DERA,MAP3K1,RTL8C,ZC3H12C,STK32B,I  
 GHM,VASP,TIMP1,ZNF667-  
 AS1,ITGA9,IL10RA,GPN3,NACC2,ADORA2B,DOK3,RNF135,H2BC21,VNN2,FOS,LDLRAP1,F  
 CGR3B,LRG1,NAPSB,TNFRSF17,ATP6V0D1,OLFML2A,TST,PAM,TET2,PPP1R3D,KRT18,LO  
 C339803,SRGAP2C,RASSF3,ATP6V1A,CPD,PNP,TMEM216,ZDHHC2,CAVIN2,MAN1A1,APP  
 L1,TNS3,RNF217,NIBAN1,LRRK1,JAG1,RASGRP4,SLC35D2,HOXA10,IRF2,IGSF6,PRKAR2B,  
 NLRP3,ACSM3,EPDR1,ATG4C,MLC1,LPL,ARL4A,B3GNT5,PHACTR1,CD86,STAP1,RRAS,Z  
 NF296,SIRPA,FCER1A,PTAFR,DCAF12,KIAA0930,PCTP,RIPK2,LYST,SIGLEC5,LINC01181,P  
 F4,KIF13A,NABP1,S100A4,LGALS1,APOBEC3B,CETN3,TSPO,SNTB1,QKI,ENTPD1,HCAR3,  
 NOD2,MARCHF1,SYK,MYOF,C17orf58,ARPC1B,LGALS3,AP2B1,HPSE,STX3,SETD6,HLA-  
 DQA1,PTGR1,ADAM28,STX7,NPC2,S100A10,HCST,LOC100996740,C5AR1,B4GALT5,MS4A4  
 A,CSF2RA,STOM,NOG,RGS19,VSIG4,SERPINB10,ALDH3A2,PLXDC2,PIP5K1B,ERMP1,GAS  
 K1B,RGS2,PARVB,CTSB,FUT4,TMEM60,IGFBP7,BAALC,SMIM20,MGAM,SLC22A15,PLBD1  
 ,PLTP,MINPP1,EPX,SKAP2,TMEM220,ZEB2,LYL1,CISD1,GPR183,SULF2,IGSF10,CD44,SPTS  
 SA,CD74,CREBL2,HYMAI,CTSA,BSG,GPD1L,TENT5A,SPOPL,CYSLTR1,IRS2,VAMP8,FNDC  
 3B,SDSL,TPP1,CPED1,FUCA2,PTPN18,STX11,FCGR2B,MGST2,FRAT1,OSCAR,FPGT,SRXN  
 1,SLC7A7,SPATA20,SLCO3A1,DUSP3,FAM107B,C14orf119,SRGAP2,SNAI3,CD180,C11orf74,  
 SLC45A3,ABHD15,CNRIP1,ERLIN1,TRIM58,PROM1,PLD1,HSPC324,GBGT1,SERPING1,CD3  
 6,MCTP1,NAGA,KBTBD11,NRGN,ZNF185,ADGRE1,CTSS,PTGS1,CST3,VSIR,DIAPH2,MMP9  
 ,CPNE8,HLA-  
 DQB1,TNFRSF1A,KLF1,GLIPR1,BLVRB,FCN1,ITPRIPL2,QPCT,HK3,XIST,TLR8,CIDEB,FRA  
 T2,LOC100507642,HEATR5A,MEF2C,CXCR2,CRISP3,ASL,MN1,PTGS2,BST1,VCAN,CYFIP1,  
 HGF,HLA-DPB1,WDR49,HEBP1,C5orf30,SLC22A4,FAR2,CARD8-  
 AS1,CHCHD10,DUSP23,M6PR,CLEC12A,PRR34-  
 AS1,GGTA1P,HOXA5,LY86,GGH,MAP3K5,MSRB3,TREM1,HOMER3,NRIP1,PLAGL1,ARSD,  
 CLEC5A,RAB7B,CDA,LOC643072,CCNA1,CPNE2,PTX3,LXN,S100A11,FAM49A,TTC7B,HLA  
 -  
 DMB,S100P,CREG1,MROCK1,SLC27A3,ZYX,P2RY13,ITGAV,CD14,ACSL1,EGLN1,LYN,EGR  
 1,THSD7A,S100A8,LILRA2,CCR2,CEACAM6,NKX2-  
 3,ANXA4,KCTD12,GPR160,RAB13,MMRN1,FGR,PPP3CA,APLP2,HOXB2,TFEC,ANXA5,TLR  
 4,LOC105377276,ZNF516,UBE2E2,NPR3,MFSD1,ATP10D,ZNF804A,RAB31,KCNE3,PRRG4,O

---

LIG1,CBR1,TNFAIP8L2,C3AR1,SLITRK4,PIK3AP1,FGL2,LACTB2,EPS8,LRMDA,LINC00623, CARD6,NR1H3,CACNA2D3,SLC27A2,MS4A6A,VSTM1,KLF4,BCL11A,GRB10,CTNNA1,CSF1 R,MSRB1,CRIP1,PYCARD,RGS18,THEMIS2,GPX1,GSAP,SPI1,CD300LF,CA2,CCL23,MYADM ,S100A12,PLEK,DHRS9,PRAM1,FCER1G,MANSC1,MMP8,DRAM1,TRBV27,SRGN,FES,DEPD C7,PRXL2C,SERPINI2,CCR1,GALNT11,PRAG1,CTBP2,RXFP1,SUCNR1,GRN,IMPACT,HBD,C TSG,NFE2,GCA,LTF,GTSF1,MYO1F,B3GALNT1,S100A9,BLNK,IMPA2,HLX,IL6R,STAR,FLT 3,MS4A7,BTK,MEIS1,P2RY14,SAMHD1,SLC25A43,DACH1,CYTL1,ADRB2,C3orf80,SIRPB2,C SF2RB,TCN1,GPAT3,MAP7,CEBPD,IL1B,LMO2,MEST,SMIM15,CPA3,CSF3R,IRAK3,PTH2R, DUSP6,RNASE6,PPBP,IL13RA1,HLA- DRA,ZSWIM6,PROK2,PRG2,PRKCD,UBE2E3,TPSAB1,C1orf162,NCF4,ECRP,CD33,KIT,F13A1 ,NCF2,CEACAM8,PYGL,LYZ,PDLIM1,VNN1,HLA-DMA,MPEG1,HLA- DPA1,HCK,CFP,MAMDC2,DEFA4,PRTN3,PDGFC,RNASE3,TLR2,TNFSF13B,FCGR1B,TUBB6 ,GNAI1,TYROBP,LOC102724587,CSTA,CEBPA,IL18,MS4A3,CLC,LOC101928429,MGST1,MN DA,TPSB2,GAPT,PLA2G4A,MPO,ELANE,CFD,ATP8B4,RNASE2,AZU1

---

**Supplementary Table 11. DEGs of AML vs T-ALL identified in GSE131184**

Gene symbol (up-regulated DEGs)

CTHRC1,GXYLT2,CD3D,FZD6,CHI3L2,MAL,HHIP-AS1,LCK,ZNF711,SNTG2-  
 AS1,CCR9,TOX2,CD7,GATA3,PLCB4,GAS2,ZAP70,CD3G,TRBC1,PRTFDC1,TRAT1,CAMK4,  
 HHIP,ELOVL4,TSPAN7,SHISA2,FAM110C,BCL11B,FAM169A,LINC01215,MZB1,DNTT,CRN  
 DE,WAKMAR2,SH2D1A,RASGRP1,SCN2A,ZNF827,SPRY1,LOC285097,UBASH3A,ICOS,ITK,  
 CD3E,FRMD6,LEF1,ARPP21,NDST3,FAT1,TCF7,PCAT18,TUBB2A,SEPTIN1,TOX,MYEF2,RH  
 OH,CLGN,PPP1R16B,SCGB3A1,HES4,H2BW4P,CRY1,ARL4C,P2RX5,NID2,RUFY3,CD1B,LEF  
 1-  
 AS1,SBK1,MLLT11,KRT72,SCAI,MME,STARD4,RPS4Y1,ARMCX2,CLDN5,IRX5,ATP9A,PVR  
 IG,TRIB2,BAG3,VPREB1,KIF3A,CYFIP2,USP9Y,EVL,IFI44,PXDN,SLC19A2,CD247,LUNAR1,  
 TASP1,CAPSL,MYH10,NMT2,PGGHG,PABPC4L,KCNK17,TMEM131L,KDM5D,GALNT6,CD  
 H2,XG,C12orf75,JUN,LINC01260,CXorf65,UMODL1,PGAP1,GPRASP1,FCGBP,SFXN1,SCN3A,  
 ITM2A,DDIT4,LAT,IL7R,STAT4,TNFAIP3,AEBP1,IFITM1,DBH-  
 AS1,PMAIP1,LZTFL1,LINC01806,SH3BP5,LOC101928963,ZEB1,SEC31B,ABLIM1,DPEP1,H3C  
 2,LRP12,CHRNA5,FXYD2,PIK3C2B,CHD1,LDLRAD4,DUXAP10,OCIAD2,TENM1,HES1,N4BP  
 2,ARHGAP21,PARD3,LIMS2,TXLNGY,BCL7A,ENO2,ALMS1-  
 IT1,LINC01238,SLC7A3,PBK,RAP1GAP2,PTPRD,CD1E,CD1A,PKIA,LAX1,MREG,CEP85L,TS  
 PYL2,HAUS3,RAB15,CR2,NAP1L5,NBAT1,PCBP3,EPHB6,RORA,PRKCH,BACE2,LIPC,CENP  
 U,HMHB1,GALNT2,RUBCNL,TTY15,CLK1,PIGA,ZBTB21,ZNF682,ENPEP,ZNF423,RNF103,  
 SLC37A3,TSHR,PLCG1,TFDP2,TIAM1,NINL,PRKCQ,TMEM178A,NSG1,WHAMM,ARHGAP3  
 2,MSL2,RGS9,NKD2,PEX5L,TRO,EIF1AY,PXYLP1,RTL6,BTBD11,PCDHB14,SLC23A1,GPR17  
 ,ARHGAP5,YOD1,CD2,ALDH8A1,RC3TB2,ZNF329,HNRNPA1,TNF,HDGFL3,ELOVL5,MORC  
 4,SELENOW,ZBTB8A,LCT-  
 AS1,KLF12,CCNL1,OR7E14P,PCDH10,GAL3ST4,SLC4A4,SERINC5,CEP95,CCDC136,STMN1,  
 VASH2,PLCL1,KCNA3,RLF,PRSS2,LOC101928000,IFI44L,FHIT,ZNF836,CCDC141,CD5,PJVK,  
 LY6H,GPR174,DPP4,LOC100505501,PLEKHG4B,NLGN4X,LIME1,MOB1B,DDX3Y,MEX3C,B  
 EX3,SALL2,SLC16A10,IL32,AJAP1,CCDC138,STAM,CEP70,SCG2,ADA,NLRC3,MGAT4A,SL  
 C7A11,SMIM17,MAGED1,RHOBTB1,RANBP2,H1-3,THUMPD2,CDCA7,LPAR6,EPSTI1

**Supplementary Table 12. DEGs of AML vs T-ALL identified in GSE131184**

Gene symbol (down-regulated DEGs)

HOXB-

AS3,TRIM27,SHTN1,NETO2,GLCE,KCNQ5,DYSF,IDH1,RTL8C,NRIP1,CRNKL1,HAL,SMCO4,ATP2B1,HIP1,OLFML2A,RNASEL,MMEL1,RBKS,NIBAN1,BASP1,AQP9,RHBDF2,CPT2,CTEX1D1,GMPR,MAP3K20,CD37,ZDHHC2,SIGLEC5,ZNF296,TMTC2,MTLN,PDE4B,GLRX2,TNFRSF1B,GLA,HPS5,B3GNT5,TIMP1,SPART,TRIB1,ZSCAN31,METTTL7B,CASP1,SYNGR1,LGALS2,C20orf194,IGHM,CRISP3,FAM174A,ATP6V0E1,SRGAP2C,ST3GAL6,PRKAR2B,PCBD1,MILR1,MRC1,DUSP27,PHACTR1,CD24,EPHX1,PTAFR,WFDC1,AGTRAP,GYG1,APPL1,LRG1,RALB,PPP1R3D,DEFB1,SCO2,CERS6,C17orf58,FGD4,SLPI,FRMD3,C2orf76,TST,MAP3K1,BCL2A1,RGS19,MRPS28,C1QTNF4,RHOQ,LY75,DERA,PLXDC2,BEX1,LOC100996740,COPS7A,EEF1AKNMT,LOC339803,IGSF6,MIR10A,RNFT1,GPR27,ELOVL7,ZNF404,DCAF12,NCEH1,HOXB3,INPP5D,ANGPT1,RNF217,QKI,ACVR1,RAB10,SELENOP,RPP40,S100A4,RA SGRP4,SWAP70,ZC3H12C,NOD2,SLC35F2,HSD17B11,TSPO,LPL,CPD,TMA16,PRMT6,THE M4,BSG,BLVRB,ARPC1B,PLPP6,NDUFAF1,SPINK2,EGFL7,TMEM71,OPN3,ARL4A,STX3,SDSL,SPTLC2,STK32B,DOK3,DAB2,BBS12,CCPG1,SLC22A16,GNG11,ASAP2,CNRIP1,TMEM106B,PSTPIP2,LGALS3,NACC2,GOLPH3L,SIRPA,ARHGEF40,CCDC126,IRF2,TMEM192,DYNLT1,EGR3,PRR34-

AS1,LDLRAP1,NAPSB,KIAA0930,DHRS7B,SLC22A15,SERPINB10,EGR2,CYTIP,DPY19L2,CD86,ATP6V1A,TMEM216,NLRP3,RAB32,GBGT1,RBPMS,PNPLA4,ANXA1,SERPINB2,MGST2,DYNLL1,IGF2BP2,SLC31A2,PHF23,RRAS,CXorf21,RASSF2,CAVIN2,HDHD5,BNIP3,JAK2, MGAM,PNP,CD34,SPATA20,PCTP,UBR5-

AS1,TRH,ARL11,SLC35A5,IL10RA,PAM,FCER1A,ASL,PARVB,PIP5K1B,ANXA5,ABHD17C,STAP1,LAPTM4B,MUC19,CAV1,CLCC1,COCH,LYST,ANTXR2,LINC01410,ITGA9,RNF135,MYOF,RIPK2,SLC15A2,SNTB1,TNS3,FOS,PF4,TRIM58,VSIR,SLC35D2,SRXN1,DEGS1,HHEX,NPW,FUT4,TNFAIP6,VSIG4,MINPP1,VNN2,KIF13A,C1GALT1C1,JAML,CD44,LRRK2,SPARC,HK3,LINC00899,PTGR1,TNFRSF17,XIST,FCN1,ADGRE1,SMIM20,BRI3BP,EPX,ADORA2B,SERPING1,STX7,CPNE8,HLA-

DQA1,CD74,MS4A4A,IGFBP7,FRAT1,SLC2A5,ENTPD1,ALDH3A2,SETD6,FAM107B,GASK1B,ADAM28,ANXA3,SLCO3A1,SNAI3,CSF2RA,SPTSSA,LYL1,CST7,IRS2,LINC01181,TPK1,ACSM3,CTSB,SULF2,GPN3,CDA,TLR1,PSENN,STX11,HBD,KRT18,FUCA2,VAMP8,CETN3,GGH,SLC45A3,STOM,RGS2,MARCHF1,SLC7A7,PTPN18,BCL11A,IGSF10,MLC1,NABP1,CD36,KLHL13,LRRK1,PTGER2,CYBRD1,CPPED1,RASSF3,SYK,HPSE,CST3,CX3CR1,B4GALT5,ITPRIPL2,S100A10,FRAT2,PIWIL4,GPD1L,ABHD15,ZEB2,C14orf119,SRGAP2,SPOPL,CREBL2,FNBP1L,C5AR1,TMEM220,GPR183,ATG4C,HCAR3,NAGA,LGALS1,ZYX,CRIP1,EGLN1,QPCT,TREM1,DUSP3,GNS,OSCAR,TPP1,CTSA,TMEM60,HEBP1,FCGR2B,BAALC,M6PR,MCTP1,S100P,CIDEB,EPDR1,HLA-

DQB1,MAN1A1,CHCHD10,TNFRSF1A,CA2,FCGR3B,PPP3CA,HSPC324,C11orf74,PLTP,ITGAV,FAM49A,PTGS1,GLIPR1,CYSLTR1,CPNE2,MROCK1,FAR2,WDR49,ERMP1,FPGT,OLIG1,CXCR2,UBE2E2,HLA-

DPB1,SLC27A3,MN1,C5orf30,LY86,SKAP2,CEACAM6,NRGN,CTSS,MMRN1,LTF,HOXA5,KBTD11,PLD1,GPR160,ARSD,BST1,LXN,DIAPH2,TENT5A,CARD8-

AS1,CBR1,SLITRK4,FNDC3B,HOMER3,S100A8,GPX1,LOC100507642,S100A11,APLP2,SLC22A4,FGR,DUSP23,KLF4,HOXB2,ZNF185,HEATR5A,RAB13,PRRG4,LOC643072,RAB7B,TLR

---

8,LILRA2,PTX3,LINC00623,CYFIP1,NOG,TTC7B,HLA-DMB,LYN,CCL23,PYCARD,THSD7A,TLR4,ANXA4,GGTA1P,MYADM,LOC105377276,CARD6,ERLIN1,SPI1,CD14,HGF,MEF2C,CD180,CREG1,NKX2-3,TFEC,VCAN,NR1H3,EPSS8,CTNNA1,MSRB3,PTGS2,GSAP,SLC27A2,CCR2,KCNE3,MSRB1,LRMDA,GRB10,S100A12,PIK3AP1,P2RY13,CYTL1,ACSL1,HLX,DACH1,HYMAI,MANSC1,ZNF516,MMP8,CLEC5A,CD300LF,CLEC12A,NPR3,RXFP1,MFSD1,PRAM1,CCR1,LACTB2,MAP3K5,IMPA2,THEMIS2,VSTM1,MAP7,KCTD12,PRG2,SERPINI2,CSF1R,GRN,CACNA2D3,CTSG,ZNF804A,TNFAIP8L2,MYO1F,PLEK,RAB31,UBE2E3,CCNA1,SRGN,CTBP2,B3GALNT1,ATP10D,PLAGL1,DUSP6,PRXL2C,DHRS9,C3AR1,FES,BLNK,PRAG1,MS4A7,MS4A6A,FCGL2,FCER1G,STAR,RNASE6,CSF2RB,C3orf80,ZSWIM6,IL6R,NFE2,GPAT3,TCN1,S100A9,IMPACT,BTK,PROM1,EGR1,SMIM15,GALNT11,IL1B,CSF3R,MEIS1,CEBPD,DEPDC7,PPBP,GTSF1,IL13RA1,P2RY14,SIRPB2,PRKCD,CD33,IRAK3,PTH2R,DRAM1,SAMHD1,GCA,TPSAB1,DEFA4,NCF4,C1orf162,CEACAM8,LMO2,TRBV27,CFP,VNN1,ECRP,MEST,PDLIM1,ADRB2,RGS18,MPEG1,SLC25A43,NCF2,HCK,PROK2,LYZ,PRTN3,CPA3,HLA-DPA1,FLT3,HLA-DMA,HLA-DRA,GNAI1,MAMDC2,SUCNR1,PYGL,TYROBP,RNASE3,LOC102724587,TUBB6,CEBPA,TLR2,KIT,PDGFC,CLC,MS4A3,CSTA,IL18,F13A1,LOC101928429,FCGR1B,TNFSF13B,MPO,ELANE,TPSB2,PLA2G4A,MGST1,RNASE2,MNDA,AZU1,GAPT,CFD,ATP8B4

---



**Supplementary Table 13. Top 5 GO Enrichment Analysis Results for the AML vs T-ALL comparison**

| Category               | Term                                | Count | %        | P Value  | Genes                                                                                                                                                                                                                                                                                                                                                                                                                              |
|------------------------|-------------------------------------|-------|----------|----------|------------------------------------------------------------------------------------------------------------------------------------------------------------------------------------------------------------------------------------------------------------------------------------------------------------------------------------------------------------------------------------------------------------------------------------|
| Biological Process(BP) | immune response                     | 23    | 13.45029 | 1.00E-10 | CCR1, IL32, CD74, CR2, C5AR1, PRG2, PPBP, CST7, SAMHD1, TNFRSF1B, CTSS, HLA-DMB, ZEB1, PNP, HLA-DPB1, HLA-DRA, CTSG, CD36, IL7R, TLR4, LAT, HLA-DPA1, HLA-DQB1                                                                                                                                                                                                                                                                     |
|                        | inflammatory response               | 20    | 11.69591 | 4.14E-09 | LYN, CCR1, CSF1R, LXN, PTGER2, C5AR1, LY86, PPBP, FOS, AZU1, LYZ, PTGS2, TNFRSF1B, THEMIS2, KIT, C3AR1, PRKCQ, CD14, TLR4, LAT                                                                                                                                                                                                                                                                                                     |
|                        | response to lipopolysaccharide      | 11    | 6.432749 | 4.09E-06 | PTGER2, C5AR1, CTSG, CSF2RB, FOS, PPBP, TRIB1, PTGS2, MPO, TLR4, ELANE                                                                                                                                                                                                                                                                                                                                                             |
|                        | T cell receptor signaling pathway   | 10    | 5.847953 | 1.29E-05 | ITK, THEMIS2, TRAT1, HLA-DPB1, HLA-DRA, PRKCQ, CD247, LAT, HLA-DPA1, HLA-DQB1                                                                                                                                                                                                                                                                                                                                                      |
|                        | antigen processing and presentation | 7     | 4.093567 | 1.39E-05 | CD74, HLA-DMB, HLA-DPB1, HLA-DRA, CTSS, HLA-DPA1, HLA-DQB1                                                                                                                                                                                                                                                                                                                                                                         |
| Cellular Component(CC) | plasma membrane                     | 65    | 38.0117  | 3.20E-06 | FLT3, MLC1, IRS2, ENO2, GLIPR1, RGS2, CA2, C3AR1, FCER1A, CTSG, HOMER3, CD36, HLA-DPA1, PPP1R16B, CR2, FCER1G, PRKCH, ACSL1, PVRIG, TNFRSF1B, ARL4A, KIT, BLVRB, PRTN3, PRKCQ, TLR4, CD44, HLA-DQB1, SKAP2, CSF1R, PTGER2, C5AR1, CSF2RB, ADRB2, SAMHD1, RASGRP1, CD1B, STX11, PRKAR2B, PDGFC, CD14, PROM1, SCN3A, CCR1, LYN, CD74, ZNF185, GCA, TRAT1, LY86, TSHR, BST1, LPAR6, CPD, FXYD2, RAB13, FAT1, HLA-DPB1, HLA-DRA, NMT2, |

| CD247, IL7R, ITM2A, LAT, SERINC5 |                         |          |          |                                                                                                                                                                                                                                                                                                                                                                                                               |                                       |
|----------------------------------|-------------------------|----------|----------|---------------------------------------------------------------------------------------------------------------------------------------------------------------------------------------------------------------------------------------------------------------------------------------------------------------------------------------------------------------------------------------------------------------|---------------------------------------|
| cell surface                     | 19                      | 11.11111 | 2.55E-06 | CD74, CSF1R, FCER1G, C5AR1, CD1B, TSHR, FUT4, LGALS1, PDGFC, HLA-DPB1, HLA-DRA, FCER1A, CTSG, CD36, PROM1, TLR4, CD44, ELANE, HLA-DPA1                                                                                                                                                                                                                                                                        |                                       |
| MHC class II protein complex     | 6                       | 3.508772 | 1.41E-06 | CD74, HLA-DMB, HLA-DPB1, HLA-DRA, HLA-DPA1, HLA-DQB1                                                                                                                                                                                                                                                                                                                                                          |                                       |
| extracellular space              | 39                      | 22.80702 | 3.08E-10 | CFD, CSTA, AEBP1, CST7, ENO2, MPO, CTSS, CST3, LGALS1, CA2, PDGFC, STOM, CYTL1, IGFBP7, CTSG, CD14, TIMP1, CD36, PROM1, PLTP, ELANE, S100A11, CTSB, CPA3, IL32, EGFL7, LY86, RNASE3, PPBP, AZU1, LYZ, VCAN, TST, CPD, SELENOP, KIT, SERPING1, S100A4, PRTN3                                                                                                                                                   |                                       |
| extracellular exosome            | 60                      | 35.08772 | 1.70E-10 | CYFIP1, ENO2, MPO, HEBP1, TUBB6, LGALS1, PNP, CA2, TSPO, MAN1A1, CTSG, TIMP1, CTSB, CR2, PRKCH, RNASE6, RNASE3, TST, SELENOP, BLVRB, SERPING1, ZNF711, S100A4, PRTN3, CD44, B4GALT5, CFD, CSTA, LXN, FGL2, AEBP1, GNS, CST3, PRKAR2B, PDGFC, STOM, IGFBP7, ASL, CD14, PROM1, MEST, S100A11, ELANE, LYN, CTSA, CD74, GCA, PRG2, AZU1, LYZ, BST1, CPD, FXYD2, RAB13, FAT1, HLA-DRA, S100P, MNDA, ITM2A, SERINC5 |                                       |
| Molecular Function(MF)           | protease binding        | 6        | 3.508772 | 0.002968                                                                                                                                                                                                                                                                                                                                                                                                      | CST3, CSTA, KIT, TIMP1, CST7, ELANE   |
|                                  | peptide antigen binding | 4        | 2.339181 | 0.002425                                                                                                                                                                                                                                                                                                                                                                                                      | HLA-DPB1, HLA-DRA, HLA-DPA1, HLA-DQB1 |

---

|                                |   |          |          |                                       |
|--------------------------------|---|----------|----------|---------------------------------------|
| cytokine binding               | 4 | 2.339181 | 7.64E-04 | CSF1R, CD74, KIT, ELANE               |
| cytokine receptor activity     | 5 | 2.923977 | 3.88E-04 | CD74, FLT3, CSF2RB, IL7R, CD44        |
| MHC class II receptor activity | 4 | 2.339181 | 3.69E-04 | HLA-DPB1, HLA-DRA, HLA-DPA1, HLA-DQB1 |

---

**Supplementary Table 14. Top 5 GO Enrichment Results for Upregulated DEGs Identified for the AML vs T-ALL Comparison**

| Category               | Term                                                  | Count | %        | P Value  | Genes                          |
|------------------------|-------------------------------------------------------|-------|----------|----------|--------------------------------|
| Biological Process(BP) | T cell receptor signaling pathway                     | 5     | 11.62791 | 3.75E-04 | ITK, TRAT1, PRKCQ, CD247, LAT  |
|                        | adaptive immune response                              | 4     | 9.302326 | 0.004861 | ITK, TRAT1, CD1B, LAT          |
|                        | intracellular signal transduction                     | 5     | 11.62791 | 0.013862 | ITK, PRKCH, SH3BP5, PRKCQ, LAT |
|                        | regulation of phosphatidylinositol 3-kinase signaling | 3     | 6.976744 | 0.014124 | PPP1R16B, TRAT1, RASGRP1       |
|                        | immune response                                       | 5     | 11.62791 | 0.016036 | IL32, CR2, ZEB1, IL7R, LAT     |
| Cellular Component(CC) | mast cell granule                                     | 2     | 4.651163 | 0.046222 | RASGRP1, LAT                   |
|                        | T cell receptor complex                               | 2     | 4.651163 | 0.039749 | TRAT1, CD247                   |
|                        | cell-cell junction                                    | 4     | 9.302326 | 0.00677  | ITK, PRKCH, FAT1, LAT          |

---

|                        |                           |    |          |          |                                                                                                                                         |
|------------------------|---------------------------|----|----------|----------|-----------------------------------------------------------------------------------------------------------------------------------------|
|                        | plasma membrane           | 20 | 46.51163 | 6.71E-04 | PPP1R16B, CR2, PRKCH, TRAT1, PVRIG, ENO2, RASGRP1, CD1B, TSHR, LPAR6, FXYD2, FAT1, NMT2, PRKCQ, CD247, IL7R, ITM2A, SCN3A, LAT, SERINC5 |
| Molecular Function(MF) | protein kinase C activity | 2  | 4.651163 | 0.033252 | PRKCH, PRKCQ                                                                                                                            |

---

**Supplementary Table 15. Top 5 GO Enrichment Results for Downregulated DEGs Identified for the AML vs T-ALL Comparison**

| Category               | Term                                                                              | Count | %        | <i>P</i> Value | Genes                                                                                                                                                                                                |
|------------------------|-----------------------------------------------------------------------------------|-------|----------|----------------|------------------------------------------------------------------------------------------------------------------------------------------------------------------------------------------------------|
| Biological Process(BP) | inflammatory response                                                             | 18    | 14.0625  | 1.86E-09       | LYN, CCR1, CSF1R, LXN, PTGER2, C5AR1, LY86, PPBP, FOS, AZU1, LYZ, PTGS2, TNFRSF1B, THEMIS2, KIT, C3AR1, CD14, TLR4                                                                                   |
|                        | immune response                                                                   | 18    | 14.0625  | 8.99E-09       | CCR1, CD74, C5AR1, PRG2, PPBP, CST7, SAMHD1, TNFRSF1B, CTSS, HLA-DMB, PNP, HLA-DPB1, HLA-DRA, CTSG, CD36, TLR4, HLA-DPA1, HLA-DQB1                                                                   |
|                        | response to lipopolysaccharide                                                    | 11    | 8.59375  | 2.99E-07       | PTGER2, C5AR1, CTSG, CSF2RB, FOS, PPBP, TRIB1, PTGS2, MPO, TLR4, ELANE                                                                                                                               |
|                        | antigen processing and presentation                                               | 7     | 5.46875  | 2.69E-06       | CD74, HLA-DMB, HLA-DPB1, HLA-DRA, CTSS, HLA-DPA1, HLA-DQB1                                                                                                                                           |
|                        | antigen processing and presentation of exogenous peptide antigen via MHC class II | 8     | 6.25     | 4.47E-06       | CD74, HLA-DMB, FCER1G, HLA-DPB1, HLA-DRA, CTSS, HLA-DPA1, HLA-DQB1                                                                                                                                   |
| Cellular Component(CC) | extracellular region                                                              | 29    | 22.65625 | 3.38E-06       | CFD, FCN1, F13A1, LILRA2, CTSS, HEBP1, CST3, GLIPR1, PNP, PDGFC, IGFBP7, CTSG, CD14, TIMP1, PLTP, ELANE, CTSB, CPA3, EGFL7, RNASE6, PRG2, RNASE3, PPBP, AZU1, TNFRSF1B, LYZ, VCAN, SELENOP, SERPING1 |
|                        | cell surface                                                                      | 17    | 13.28125 | 9.40E-07       | CD74, CSF1R, FCER1G, C5AR1, FUT4, LGALS1, PDGFC, HLA-DPB1, HLA-DRA, FCER1A, CTSG,                                                                                                                    |

|                        |                              |    |          |                                          |                                                                                                                                                                                                                                                                                                                                                 |
|------------------------|------------------------------|----|----------|------------------------------------------|-------------------------------------------------------------------------------------------------------------------------------------------------------------------------------------------------------------------------------------------------------------------------------------------------------------------------------------------------|
|                        |                              |    |          | CD36, PROM1, TLR4, CD44, ELANE, HLA-DPA1 |                                                                                                                                                                                                                                                                                                                                                 |
|                        | MHC class II protein complex | 6  | 4.6875   | 3.36E-07                                 | CD74, HLA-DMB, HLA-DPB1, HLA-DRA, HLA-DPA1, HLA-DQB1                                                                                                                                                                                                                                                                                            |
|                        | extracellular exosome        | 51 | 39.84375 | 2.51E-11                                 | CYFIP1, MPO, HEBP1, TUBB6, LGALS1, PNP, CA2, TSPO, MAN1A1, CTSG, TIMP1, CTSB, RNASE6, RNASE3, TST, SELENOP, BLVRB, SERPING1, S100A4, PRTN3, CD44, B4GALT5, CFD, CSTA, LXN, FGL2, GNS, CST3, PRKAR2B, PDGFC, STOM, IGFBP7, ASL, CD14, PROM1, MEST, S100A11, ELANE, LYN, CTSA, CD74, GCA, PRG2, AZU1, LYZ, BST1, CPD, RAB13, HLA-DRA, S100P, MNDA |
|                        | extracellular space          | 36 | 28.125   | 2.98E-12                                 | CFD, CSTA, CST7, MPO, CTSS, CST3, LGALS1, CA2, PDGFC, STOM, CYTL1, IGFBP7, CTSG, CD14, TIMP1, CD36, PROM1, PLTP, ELANE, S100A11, CTSB, CPA3, EGFL7, LY86, RNASE3, PPBP, AZU1, LYZ, VCAN, TST, CPD, SELENOP, KIT, SERPING1, S100A4, PRTN3                                                                                                        |
| Molecular Function(MF) | cytokine receptor activity   | 4  | 3.125    | 0.002314                                 | CD74, FLT3, CSF2RB, CD44                                                                                                                                                                                                                                                                                                                        |
|                        | peptide antigen binding      | 4  | 3.125    | 0.001108                                 | HLA-DPB1, HLA-DRA, HLA-DPA1, HLA-DQB1                                                                                                                                                                                                                                                                                                           |
|                        | protease binding             | 6  | 4.6875   | 8.90E-04                                 | CST3, CSTA, KIT, TIMP1, CST7, ELANE                                                                                                                                                                                                                                                                                                             |
|                        | cytokine binding             | 4  | 3.125    | 3.44E-04                                 | CSF1R, CD74, KIT, ELANE                                                                                                                                                                                                                                                                                                                         |

---

|                                |   |       |          |                                       |
|--------------------------------|---|-------|----------|---------------------------------------|
| MHC class II receptor activity | 4 | 3.125 | 1.65E-04 | HLA-DPB1, HLA-DRA, HLA-DPA1, HLA-DQB1 |
|--------------------------------|---|-------|----------|---------------------------------------|

---

**Supplementary Table 16.** The DEGs with the top 10 highest network degree values for PPI networks generated for the AML vs T-ALL comparison

---

|             |      |      |          |       |      |           |            |      |      |      |
|-------------|------|------|----------|-------|------|-----------|------------|------|------|------|
| Node        | TLR4 | MPO  | MND<br>A | CSF1R | CD44 | C3AR<br>1 | FCER<br>1G | CTSS | LYN  | FOS  |
| Description | down | down | down     | down  | down | down      | down       | down | down | down |
| Degree      | 32   | 28   | 26       | 26    | 25   | 23        | 23         | 23   | 21   | 20   |

---

**Supplementary Table 17.** The upregulated DEGs with the top 10 highest network degree values for PPI networks generated for the AML vs T-ALL comparison

---

|             |     |     |       |           |           |             |      |     |      |      |
|-------------|-----|-----|-------|-----------|-----------|-------------|------|-----|------|------|
| Node        | LAT | ITK | CD247 | PRKC<br>Q | TRAT<br>1 | RASG<br>RP1 | CD1B | CD2 | DNTT | IL7R |
| Description | up  | up  | up    | up        | up        | up          | up   | up  | up   | up   |
| Degree      | 5   | 5   | 4     | 4         | 3         | 3           | 2    | 2   | 2    | 1    |

---



**Supplementary Table 18.** The downregulated DEGs with the top 10 highest network degree values for PPI networks generated for the AML vs T-ALL comparison

| Node        | TLR4 | MPO  | MND<br>A | CSF1R | C3AR<br>1 | CTSS | FCER1<br>G | CD44 | FOS  | ELAN<br>E |
|-------------|------|------|----------|-------|-----------|------|------------|------|------|-----------|
| Description | down | down | down     | down  | down      | down | down       | down | down | down      |
| Degree      | 28   | 26   | 26       | 26    | 23        | 23   | 21         | 21   | 19   | 19        |

## REFERENCES

1. Stone N, Kendall C, Smith J, Crow P, Barr H. Paul crow and hugh barr raman spectroscopy for identification of epithelial cancers. *Faraday Discuss* (2004)126: 141-57.
2. Pully VV, Lenferink A, Otto C. Time Lapse raman imaging of living cells. *J Raman Spectrosc* (2015) 42: 23.
3. González-Solís JL, Martínez-Espinosa JC, Salgado-Román JM, Palomares-Anda P. Monitoring of chemotherapy leukemia treatment using Raman spectroscopy and principal component analysis. *Lasers Med Sci* (2014) 29: 1241-9.
4. da Silva AM, de Siqueira E Oliveira F, de Brito P, Silveira L. Spectral model for diagnosis of acute leukemias in whole blood and plasma through Raman spectroscopy. *J Biomed Opt* (2018)23: 1-11.
5. Nargis HF, Nawaz H, Ditta A, Mahmood T, Majeed M, Rashid N, et al. Raman spectroscopy of blood plasma samples from breast cancer patients at different stages. *Spectrochim Acta A Mol Biomol Spectrosc* (2019) 222: 117210.
6. Managò S, Valente C, Mirabelli P, Circolo D, Basile F, Corda AC. A reliable Raman-spectroscopy-based approach for diagnosis, classification and follow-up of B-cell acute lymphoblastic leukemia. *Sci Rep* (2016) 6: 24821.
